# Supplementary material for: Development of a New Tomato Torrado Virus-Based Vector Tagged with GFP for Monitoring Virus Movement in Plants
Source: MDPI journal article supplement (doi:10.3390/v12101195), 2020-10-20
Supplement: s1 [file s1]

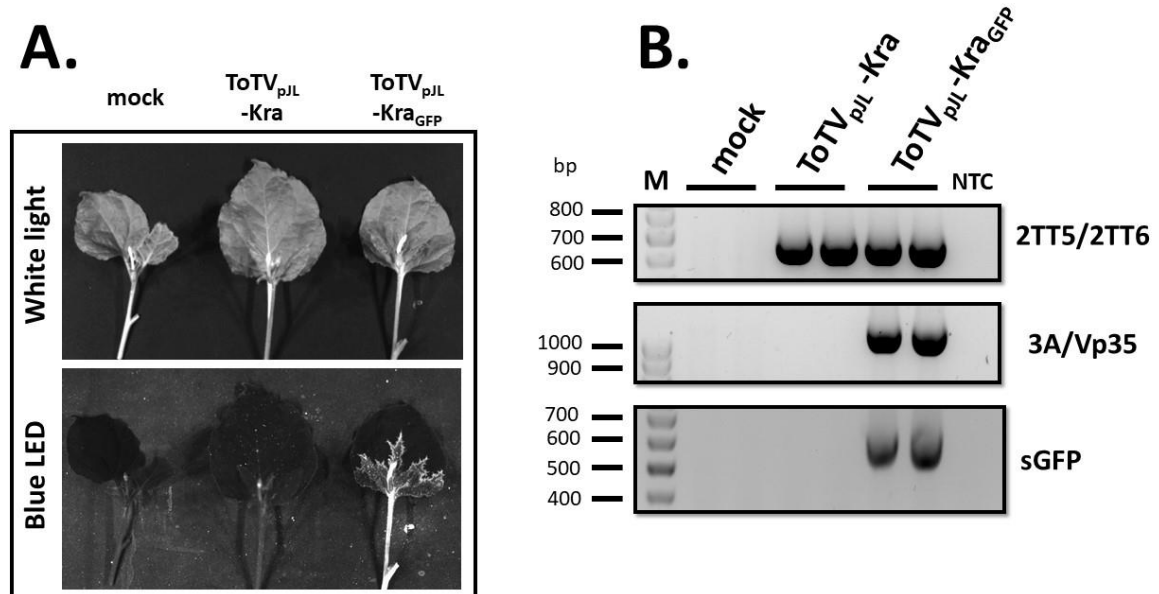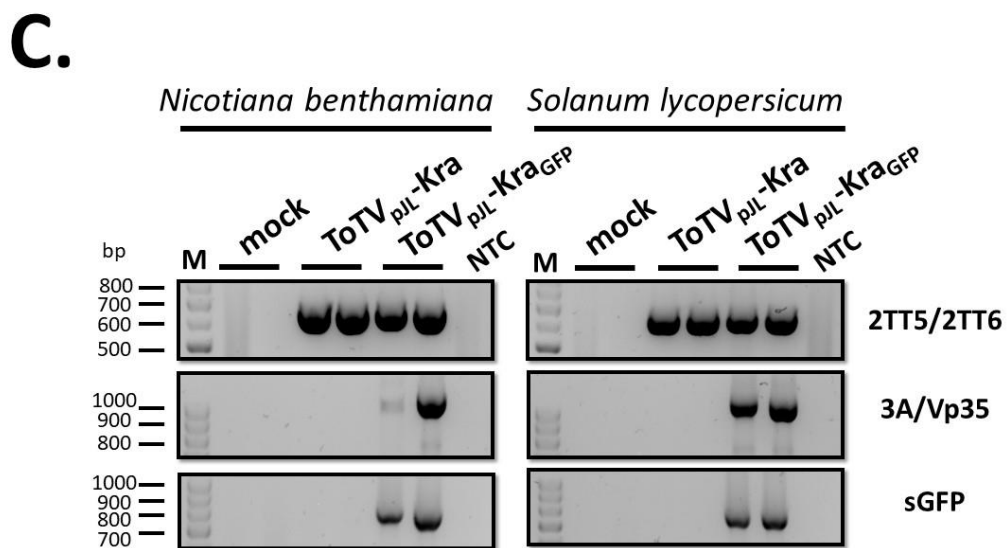

**Supplementary Figure S1.** Green fluorescent protein-tagged ToTV (ToTV<sub>pJL</sub>-Kra<sub>GFP</sub>) is infectious and stable through passages in *Nicotiana benthamiana* and *Solanum lycopersicum*. (A) *N. benthamiana* plants were infected by ToTV<sub>pJL</sub>-Kra or ToTV<sub>pJL</sub>-Kra<sub>GFP</sub> by agroinfiltration, and six days after infiltration, GFP fluorescence was verified only in ToTV<sub>pJL</sub>-Kra<sub>GFP</sub>-infected plants. Under blue LED light in the leaves and main stems of plants infected by ToTV<sub>pJL</sub>-Kra<sub>GFP</sub>, sGFP-derived fluorescence was detected; (B) The

presence of either ToTV<sub>pIL</sub>-Kra or ToTV<sub>pIL</sub>-Kra<sub>GFP</sub> in *N. benthamiana* was assessed by reverse transcription-polymerase chain reaction (RT-PCR) with three primer pairs (2TT5/2TT6, 3A/Vp35 and sGFP), as described in the Materials and Methods. The positively verified plants were used as virus sources for mechanical sap inoculation of *N. benthamiana* and *S. lycopersicum* seedlings; (C) RT-PCR-based analysis of passaged viruses in inoculated *N. benthamiana* and tomato plants. For RT-PCR, the abovementioned primer pairs were used.
